# Supplementary material for: Potent Anti‐Inflammatory and Pro‐Resolving Effects of Anabasum in a Human Model of Self‐Resolving Acute Inflammation
Source: PubMed Central journal article supplement — Clin Pharmacol Ther. 2018 Jan 30;104(4):675–86. doi: 10.1002/cpt.980 (PMC6175297; doi:10.1002/cpt.980), 2018-01-30
Supplement: CPT-104-675-s002.pdf [file CPT-104-675-s002.pdf]

# SUPPLEMENTARY INFORMATION

A

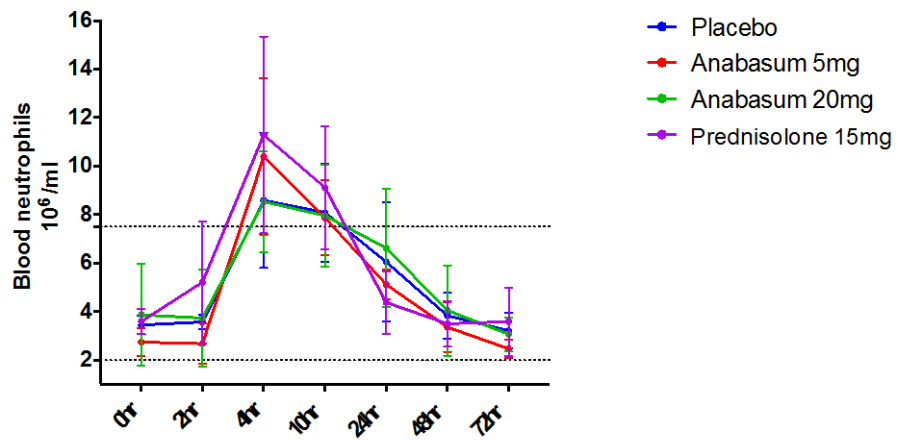

B

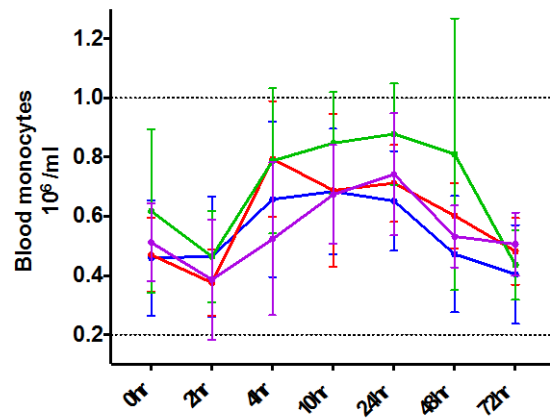

C

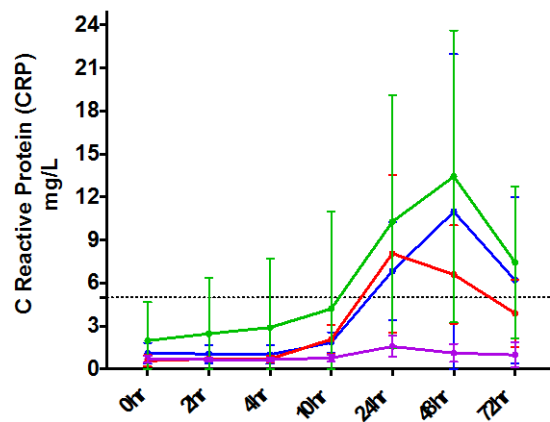

## Figure S1: Effects of anabasum on peripheral blood neutrophils, monocytes and CRP

Healthy male volunteers were randomized to receive by oral route either placebo, 5 mg anabasum, 20 mg anabasum, twice daily or 15 mg prednisolone once daily for four days. On fourth day, acute inflammation was triggered by intradermal injection of  $1.5 \times 10^7$  UV killed *E. coli* (UVkEc) suspended in 100 $\mu$ l of saline in both the forearms. Peripheral blood was taken at specified intervals after inflammation and was processed by an external pathology lab (The Doctor's Laboratory, London, UK) for measurement of circulating neutrophil count **(A)**, circulating monocyte count **(B)** and CRP levels **(C)**. Data expressed as individual values with mean  $\pm$  SD. n=5/group.

A

**Human blister fluid  
endogenous lipid mediator score plot**

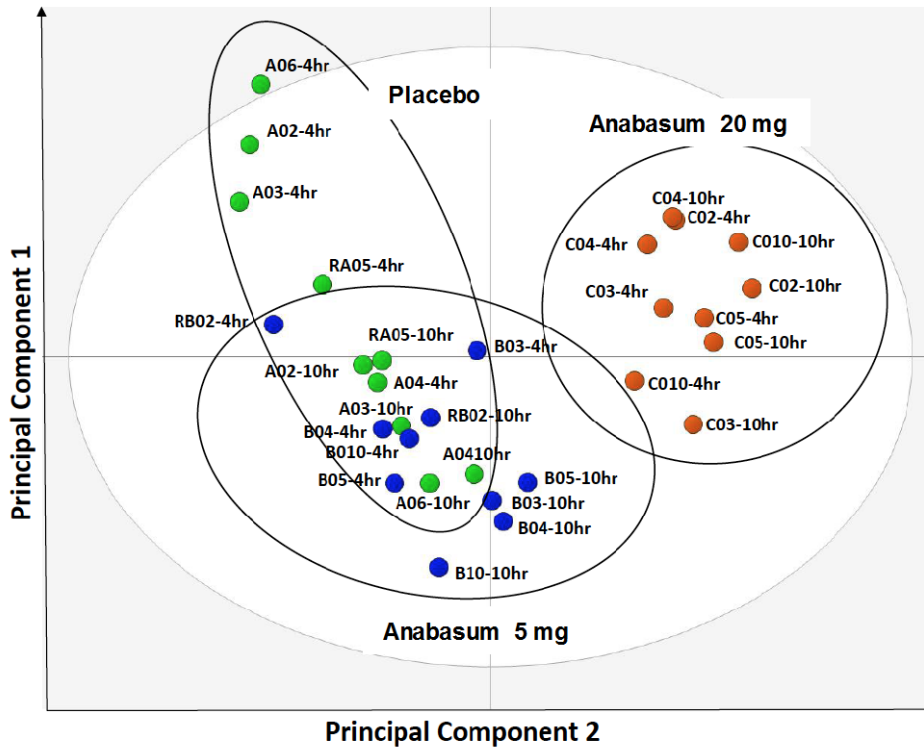

B

**Human blister fluid  
endogenous lipid mediator loading plot**

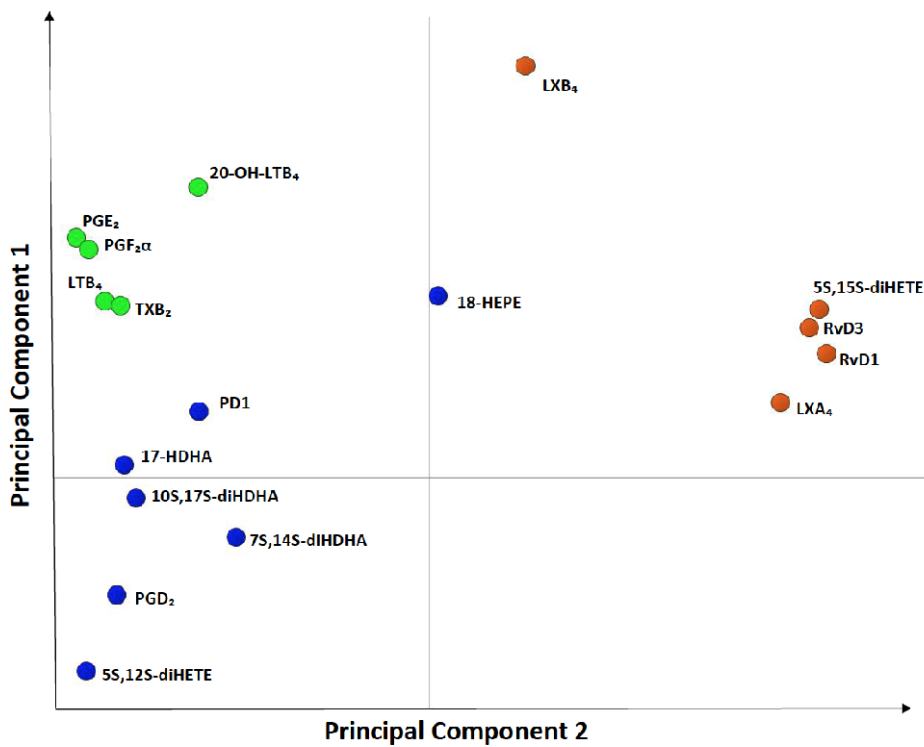

**Figure S2. Anabasum (20 mg) decreases pro-inflammatory prostanoids and increases specialized pro-resolving mediators**

Principal component analysis (PCA) was carried out using SIMCA software version 13.03.3 from Umetrics (Umea, Sweden) following identification and quantitation of each mediator from LC-MS-MS according to reported criteria[35]. **Panel A** is the 2-dimensional score plot of the values obtained from human blisters (green: placebo group, blue: anabasum 5 mg and orange: anabasum 20 mg). Gray shadow ellipse denotes 95% confidence interval. **Panel B** is the loading plot obtained for the endogenous lipid mediators identified using LC-MS-MS in human blister fluid. Green mediators identified in the placebo group; blue 5 mg and orange 20 mg anabasum group which included LXA<sub>4</sub>, LXB<sub>4</sub>, 5S,15S-DiHETE, RvD1 and RvD3.

| S.no. | Neutrophil/ml | Placebo |         | Anabasum 5mg |         | Anabasum 20mg |         | Prednisolone 15mg |         |
|-------|---------------|---------|---------|--------------|---------|---------------|---------|-------------------|---------|
|       |               | 4hr     |         | 4hr          |         | 4hr           |         | 4hr               |         |
|       |               | r       | p       | r            | p       | r             | p       | r                 | p       |
| 1     | IFN $\gamma$  | 0.9     | 0.0833  | -0.3         | 0.6833  | -0.3          | 0.6833  | -0.1              | 0.95    |
| 2     | IL-1 $\beta$  | -0.3    | 0.6833  | 0.3          | 0.6833  | 0.8           | 0.1333  | 0.2               | 0.7833  |
| 3     | IL-2          | -0.5    | 0.45    | -0.1         | 0.95    | -0.8          | 0.1333  | 0.8               | 0.1333  |
| 4     | IL-4          | 0.6     | 0.35    | -0.7         | 0.2333  | -0.5          | 0.45    | -0.3              | 0.6833  |
| 5     | IL-6          | -0.6    | 0.35    | 0.2          | 0.7833  | 0.1           | 0.95    | -0.3              | 0.6833  |
| 6     | IL-8          | -0.9    | 0.0833  | 0.1          | 0.95    | 0             | >0.9999 | 0                 | >0.9999 |
| 7     | IL-10         | 0.1     | 0.95    | -0.4         | 0.5167  | -0.2          | 0.7833  | -0.1              | 0.95    |
| 8     | IL-12p70      | 0.4     | 0.5167  | -0.6         | 0.35    | 0             | >0.9999 | -0.4              | 0.5167  |
| 9     | IL-13         | -0.6    | 0.35    | -0.1         | 0.95    | 0.1           | 0.95    | 0.4               | 0.5167  |
| 10    | TNF $\alpha$  | 0.5     | 0.45    | 0.3          | 0.6833  | 0.7           | 0.2333  | 0.6               | 0.35    |
| 11    | LTB4          | 0.3     | 0.6833  | 0.5          | 0.45    | 1             | 0.0167  | 0                 | >0.9999 |
| 12    | PGE2          | 0.6     | 0.35    | 0.1          | 0.95    | 0.2           | 0.7833  | -0.8              | 0.1333  |
| 13    | PGF2 $\alpha$ | 0.6     | 0.35    | 0.4          | 0.5167  | -0.1          | 0.95    | -0.4              | 0.5167  |
| 14    | TXB2          | 0.1     | 0.95    | 0            | >0.9999 | 0.1           | 0.95    | -0.1              | 0.95    |
| 15    | PGD2          | 0.1     | 0.95    | 0.6          | 0.35    | 0.6           | 0.35    | -0.2              | 0.7833  |
| 16    | LXA4          | 0       | >0.9999 | 0.3          | 0.6833  | -0.6          | 0.35    | NA                | NA      |
| 17    | LXB4          | 0.4     | 0.5167  | -0.8         | 0.1333  | 0.2           | 0.7833  | -0.1              | 0.95    |
| 18    | RvD1          | NA      | NA      | -0.3536      | 0.8     | 0             | >0.9999 | -0.7              | 0.2333  |
| 19    | RvD3          | NA      | NA      | NA           | NA      | -0.2          | 0.7833  | NA                | NA      |
| 20    | 17-HDHA       | -0.8    | 0.1333  | 0.2          | 0.7833  | -0.1          | 0.95    | 0.4               | 0.5167  |
| 21    | PD1           | -0.2    | 0.7833  | 0.1          | 0.95    | -0.1          | 0.95    | -0.2              | 0.7833  |
| 22    | 14-HDHA       | 0.1     | 0.95    | -0.4         | 0.5167  | 0.4           | 0.5167  | 0.2               | 0.7833  |
| 23    | 5,15-dIHETE   | NA      | NA      | NA           | NA      | -0.1          | 0.95    | 0.9               | 0.0833  |
| 24    | Endotoxin     | -0.3    | 0.6833  | 0            | >0.9999 | 0.3           | 0.6833  | -0.5              | 0.45    |
| 25    | Blood flow    | 0.8     | 0.1333  | 0            | >0.9999 | -0.7          | 0.2333  | -0.7              | 0.2333  |

| S.no. | Neutrophil/ml | Placebo |        | Anabasum 5mg |         | Anabasum 20mg |        | Prednisolone 15mg |         |
|-------|---------------|---------|--------|--------------|---------|---------------|--------|-------------------|---------|
|       |               | 10hr    |        | 10hr         |         | 10hr          |        | 10hr              |         |
|       |               | r       | p      | r            | p       | r             | p      | r                 | p       |
| 1     | IFN $\gamma$  | 0.8     | 0.1333 | -0.1         | 0.95    | 0.3           | 0.6833 | 0.9               | 0.0833  |
| 2     | IL-1 $\beta$  | 0.9     | 0.0833 | -0.1         | 0.95    | 0.5           | 0.45   | 1                 | 0.0167  |
| 3     | IL-2          | 0.9     | 0.0833 | -0.1         | 0.95    | -0.9          | 0.0833 | 0.7               | 0.2333  |
| 4     | IL-4          | 0.1     | 0.95   | -0.3         | 0.6833  | -0.8          | 0.1333 | 0.6               | 0.35    |
| 5     | IL-6          | 0.7     | 0.2333 | 0.3          | 0.6833  | -0.9          | 0.0833 | 0.9               | 0.0833  |
| 6     | IL-8          | 0.8     | 0.1333 | 0.4          | 0.5167  | 0.8           | 0.1333 | 0.9               | 0.0833  |
| 7     | IL-10         | 0.3     | 0.6833 | 0.5          | 0.45    | -0.5          | 0.45   | -0.1              | 0.95    |
| 8     | IL-12p70      | 0.9     | 0.0833 | -0.4         | 0.5167  | -0.6          | 0.35   | 0.8               | 0.1333  |
| 9     | IL-13         | 0.8     | 0.1333 | -0.3         | 0.6833  | -0.6          | 0.35   | 0.9               | 0.0833  |
| 10    | TNF $\alpha$  | 0.9     | 0.0833 | -0.1         | 0.95    | 0.4           | 0.5167 | 0.6               | 0.35    |
| 11    | LTB4          | -0.1    | 0.95   | -0.3         | 0.6833  | -0.7          | 0.2333 | 0.6               | 0.35    |
| 12    | PGE2          | 0.5     | 0.45   | -0.4         | 0.5167  | 0.9           | 0.0833 | 0.6               | 0.35    |
| 13    | PGF2 $\alpha$ | 0.9     | 0.0833 | -0.2         | 0.7833  | 0.2           | 0.7833 | 1                 | 0.0167  |
| 14    | TXB2          | 0.6     | 0.35   | 0.8          | 0.1333  | 0.9           | 0.0833 | -0.9              | 0.0833  |
| 15    | PGD2          | -0.3    | 0.6833 | 0.3          | 0.6833  | -0.3          | 0.6833 | -0.3              | 0.6833  |
| 16    | LXA4          | 0.3     | 0.6833 | 0.9          | 0.0833  | -0.7          | 0.2333 | 0                 | >0.9999 |
| 17    | LXB4          | 0.6     | 0.35   | 0.3          | 0.6833  | 0.9           | 0.0833 | 0.9               | 0.0833  |
| 18    | RvD1          | -0.4472 | 0.5    | 0.0513       | >0.9999 | 0.3           | 0.6833 | 0.3               | 0.6833  |
| 19    | RvD3          | NA      | NA     | NA           | NA      | 0.8           | 0.1333 | NA                | NA      |
| 20    | 17-HDHA       | 0.8     | 0.1333 | 0.7          | 0.2333  | -0.6          | 0.35   | 0.1               | 0.95    |
| 21    | PD1           | 0.6     | 0.35   | -0.7         | 0.2333  | -0.7          | 0.2333 | -0.6              | 0.35    |
| 22    | 14-HDHA       | 0.9     | 0.0833 | 0.6          | 0.35    | 0.2           | 0.7833 | 0.1               | 0.95    |
| 23    | 5,15-dIHETE   | NA      | NA     | NA           | NA      | 0.1           | 0.95   | 0.9               | 0.0833  |
| 24    | Endotoxin     | 0.6     | 0.35   | -0.3         | 0.6833  | -0.1          | 0.95   | 0.7               | 0.2333  |

**Figure S3: Correlation between neutrophil count and soluble mediators of inflammation at 4hr and 10hr**

| S.no. | Endotoxin<br>(Relative units) | Placebo |         | Anabasum 5mg |         | Anabasum 20mg |        | Prednisolone 15mg |         |
|-------|-------------------------------|---------|---------|--------------|---------|---------------|--------|-------------------|---------|
|       |                               | 4hr     |         | 4hr          |         | 4hr           |        | 4hr               |         |
|       |                               | r       | p       | r            | p       | r             | p      | r                 | p       |
| 1     | Neutrophil/ml                 | -0.3    | 0.6833  | 0            | >0.9999 | 0.3           | 0.6833 | -0.5              | 0.45    |
| 2     | IFN $\gamma$                  | -0.1    | 0.95    | -0.2         | 0.7833  | -0.3          | 0.6833 | 0.7               | 0.2333  |
| 3     | IL-1 $\beta$                  | -0.5    | 0.45    | 0.2          | 0.7833  | 0.3           | 0.6833 | 0.6               | 0.35    |
| 4     | IL-2                          | -0.4    | 0.5167  | -0.4         | 0.5167  | -0.3          | 0.6833 | -0.1              | 0.95    |
| 5     | IL-4                          | 0.1     | 0.95    | -0.3         | 0.6833  | -0.4          | 0.5167 | 0.6               | 0.35    |
| 6     | IL-6                          | 0.5     | 0.45    | -0.2         | 0.7833  | -0.6          | 0.35   | 0.6               | 0.35    |
| 7     | IL-8                          | -0.1    | 0.95    | 0.9          | 0.0833  | -0.8          | 0.1333 | 0.5               | 0.45    |
| 8     | IL-10                         | -0.6    | 0.35    | -0.6         | 0.35    | 0.3           | 0.6833 | -0.3              | 0.6833  |
| 9     | IL-12p70                      | -0.4    | 0.5167  | 0.1          | 0.95    | -0.8          | 0.1333 | 0.3               | 0.6833  |
| 10    | IL-13                         | 0.1     | 0.95    | 0.6          | 0.35    | -0.4          | 0.5167 | -0.3              | 0.6833  |
| 11    | TNF $\alpha$                  | 0.4     | 0.5167  | 0.7          | 0.2333  | 0.7           | 0.2333 | 0.3               | 0.6833  |
| 12    | LTB4                          | 0       | >0.9999 | -0.5         | 0.45    | 0.3           | 0.6833 | 0                 | >0.9999 |
| 13    | PGE2                          | -0.1    | 0.95    | 1            | 0.0167  | 0.3           | 0.6833 | 0.6               | 0.35    |
| 14    | PGF2 $\alpha$                 | -0.1    | 0.95    | 0.6          | 0.35    | -0.6          | 0.35   | 0.8               | 0.1333  |
| 15    | TXB2                          | 0.4     | 0.5167  | 1            | 0.0167  | 0.5           | 0.45   | 0.2               | 0.7833  |
| 16    | PGD2                          | 0.4     | 0.5167  | -0.1         | 0.95    | -0.5          | 0.45   | 0.9               | 0.0833  |
| 17    | LXA4                          | -0.2    | 0.7833  | -0.3         | 0.6833  | -0.5          | 0.45   | NA                | NA      |
| 18    | LXB4                          | -0.4    | 0.5167  | 0.3          | 0.6833  | 0.3           | 0.6833 | 0.2               | 0.7833  |
| 19    | RvD1                          | NA      | NA      | 0            | >0.9999 | -0.1          | 0.95   | -0.1              | 0.95    |
| 20    | RvD3                          | NA      | NA      | NA           | NA      | -0.5          | 0.45   | NA                | NA      |
| 21    | 17-HDHA                       | 0.8     | 0.1333  | 0.8          | 0.1333  | -0.6          | 0.35   | -0.8              | 0.1333  |
| 22    | Blood flow                    | -0.8    | 0.1333  | -1           | 0.0167  | -0.8          | 0.1333 | 0.4               | 0.5167  |

**Figure S4: Correlation between endotoxin and soluble mediators of inflammation at 4hr**

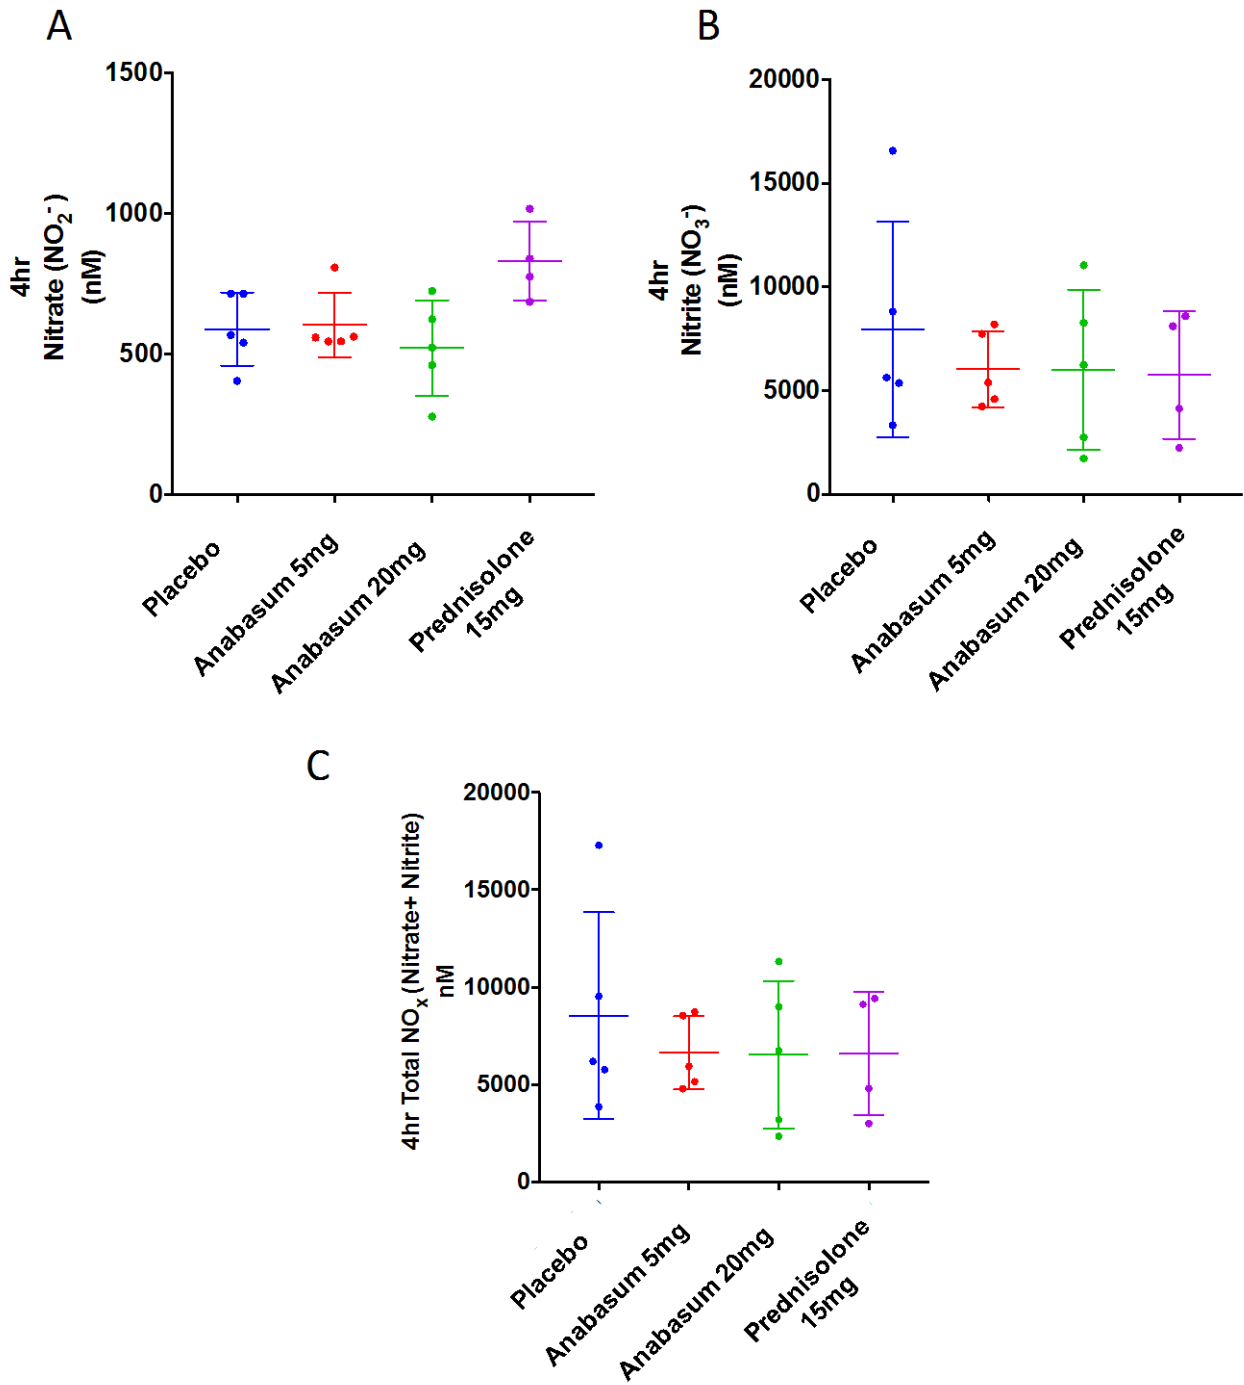

**Figure S5: Effect of Anabasum on nitric oxide synthesis at the site of UVkEc triggered acute resolving inflammation**

Healthy male volunteers were randomized to receive either placebo, 5 mg anabasum, 20 mg anabasum, twice daily or 15 mg prednisolone once daily for four days. On fourth day, acute inflammation was triggered by intradermal injection of  $1.5 \times 10^7$  UV killed *E. coli* (UVkEc) suspended in 100 $\mu$ l of saline in both the forearms. Total nitric oxide **(A)**, nitrate **(B)** and nitrite **(C)** in the cell free inflammatory exudate is shown here. Data expressed as individual values with mean  $\pm$  SD. n=5/group.



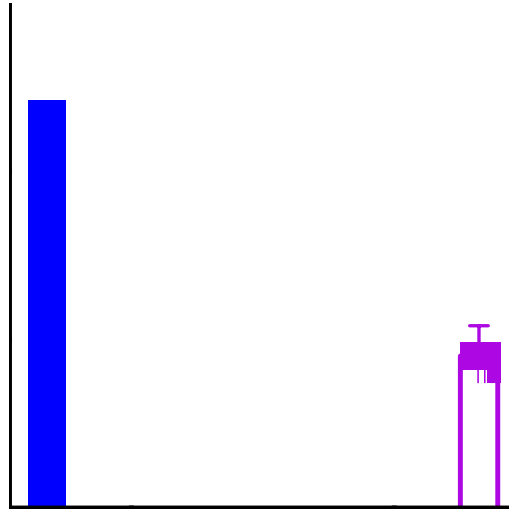

**Figure S6: Effect of Anabasum on generation of 6-keto-PGF<sub>1</sub>α at the site of UVkEc triggered acute resolving inflammation**

Healthy male volunteers were randomized to receive by oral route either placebo, 5 mg anabasum, 20 mg anabasum, twice daily or 15 mg prednisolone once daily for four days. On fourth day, acute inflammation was triggered by intradermal injection of  $1.5 \times 10^7$  UV killed *E. coli* (UVkEc) suspended in 100μl of saline in both the forearms. Inflammatory exudate at the injection site was acquired into a suction blister raised after 4hr (onset phase) on one forearm and after 10hr (resolution phase) on the contralateral forearm. The levels of 6-keto-PGF<sub>1</sub>α in the inflammatory exudate at 4hr and 10hr are shown here. Data expressed as individual values with mean ± SD. n=2/group.
